# Supplementary material for: Ru nanoparticles on Y2O3with enhanced metal–support interactions for efficient ammonia synthesis
Source: Royal Society of Chemistry journal article supplement (doi:10.1039/d2cy02035a), 2022-12-12
Supplement: d2cy02035a1.pdf [file d2cy02035a1.pdf]

Electronic Supplementary Material (ESI) for Catalysis Science & Technology.  
This journal is © The Royal Society of Chemistry 2021

## Support information

### **Ru nanoparticles on Y<sub>2</sub>O<sub>3</sub> with enhanced metal-support interaction for efficient ammonia synthesis**

Ji Feng,<sup>a,b</sup> Lin Liu,<sup>a,b\*</sup> Xilun Zhang,<sup>a,b</sup> Jiemin Wang,<sup>a,c</sup> Xiaohua Ju,<sup>a</sup> Ruili Li,<sup>d</sup> Jianping Guo,<sup>a,b</sup> Teng He,<sup>a,b</sup> Ping Chen<sup>a,b</sup>

<sup>a</sup> *Dalian National Laboratory for Clean Energy, State Key Laboratory of Catalysis, Dalian Institute of Chemical Physics, Chinese Academy of Sciences, Dalian 116023, China*

<sup>b</sup> *Center of Materials Science and Optoelectronics Engineering, University of Chinese Academy of Sciences, Beijing 100049, China*

<sup>c</sup> *Zhang Dayu School of Chemistry, Dalian University of Technology, Dalian 116024, China*

<sup>d</sup> *University of Science and Technology of China, Hefei 230026, China*

*E-mail: liulin@dicp.ac.cn*

Table S1 Catalyst activities for ammonia synthesis over various catalysts operated under similar conditions.

| Catalysts                                                | Ru loading<br>(wt%) | Temperature<br>(°C) | Pressure<br>(MPa) | WHSV (mL<br>$\text{g}_{\text{cat}}^{-1} \text{h}^{-1}$ ) | NH <sub>3</sub> synthesis                                     |  | Ref.      |
|----------------------------------------------------------|---------------------|---------------------|-------------------|----------------------------------------------------------|---------------------------------------------------------------|--|-----------|
|                                                          |                     |                     |                   |                                                          | rate<br>( $\mu\text{mol g}_{\text{cat}}^{-1} \text{h}^{-1}$ ) |  |           |
| Ru/Y <sub>2</sub> O <sub>3</sub> -p                      | 5.0                 | 400                 | 1.0               | 24000                                                    | 21120                                                         |  | This work |
| Ru/Y <sub>2</sub> O <sub>3</sub> -p                      | 5.0                 | 400                 | 1.0               | 18000                                                    | 18120                                                         |  | This work |
| Ba-Ru/AC                                                 | 9.1                 | 400                 | 1.0               | 18000                                                    | 8285                                                          |  | 1         |
| Cs-Ru/MgO                                                | 6.0                 | 400                 | 1.0               | 18000                                                    | 12117                                                         |  | 1         |
| Ru/C12A7:e <sup>-</sup>                                  | 4.0                 | 400                 | 1.0               | 18000                                                    | 6089                                                          |  | 1         |
| Ru/Pr <sub>2</sub> O <sub>3</sub>                        | 5.0                 | 400                 | 1.0               | 18000                                                    | 19000                                                         |  | 2         |
| Ru/La <sub>0.5</sub> Ce <sub>0.5</sub> O <sub>1.75</sub> | 5.0                 | 400                 | 1.0               | 72000                                                    | 64000                                                         |  | 3         |
| Ru/La <sub>0.5</sub> Pr <sub>0.5</sub> O <sub>1.75</sub> | 5.0                 | 400                 | 1.0               | 72000                                                    | 64000                                                         |  | 4         |
| Ru/BaTiO <sub>2.5</sub> H <sub>0.5</sub>                 | 4.3                 | 400                 | 5.0               | 66000                                                    | 20700                                                         |  | 5         |
| Ru/CaH <sub>2</sub>                                      | 2.0                 | 340                 | 0.1               | 36000                                                    | 4002                                                          |  | 6         |
| Ru/Ca <sub>2</sub> N:e <sup>-</sup>                      | 1.8                 | 340                 | 0.1               | 36000                                                    | 3386                                                          |  | 7         |
| Ru/Al <sub>2</sub> O <sub>3</sub>                        | 10.0                | 315                 | 0.08              |                                                          | 25.0                                                          |  | 8         |
| Cs-Ru/Al <sub>2</sub> O <sub>3</sub>                     | 10.0                | 315                 | 0.08              |                                                          | 141.5                                                         |  | 8         |
| Sm-Ru/Al <sub>2</sub> O <sub>3</sub>                     | 10.0                | 315                 | 0.08              |                                                          | 114.6                                                         |  | 8         |
| Ru/ $\gamma$ -Al <sub>2</sub> O <sub>3</sub>             | 6.3                 | 400                 | 0.1               | 9000                                                     | 789.2                                                         |  | 9         |

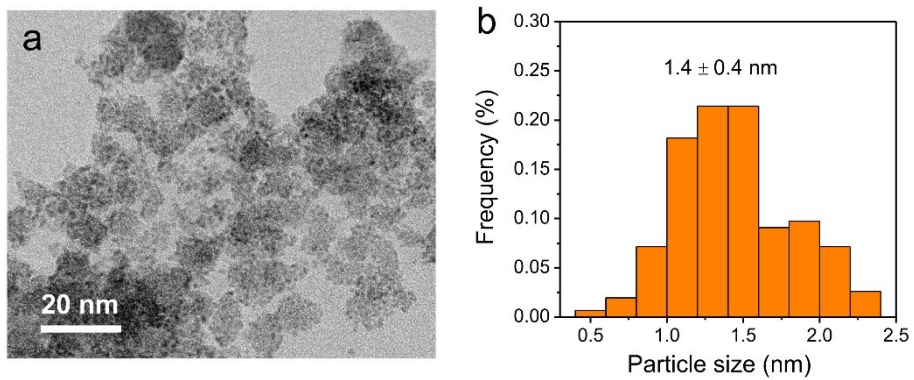

Fig. S1 TEM image (a) and particle size distribution (b) of RuO<sub>2</sub> NPs.

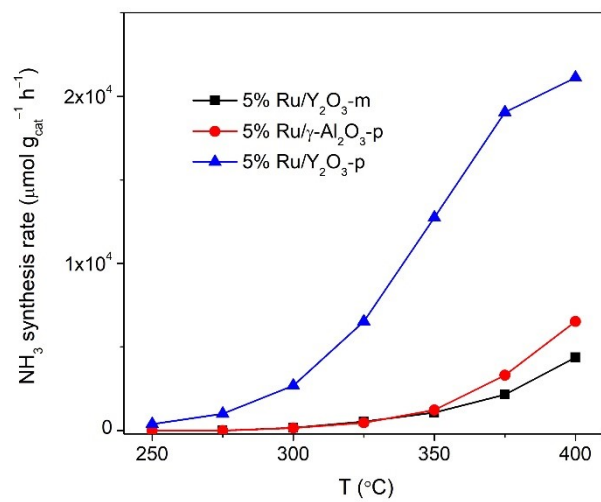

Fig. S2 Ammonia synthesis over 5% Ru/Y<sub>2</sub>O<sub>3</sub>-m, 5% Ru/ $\gamma$ -Al<sub>2</sub>O<sub>3</sub>-p and 5% Ru/Y<sub>2</sub>O<sub>3</sub>-p as a function of temperature under 1.0 MPa.

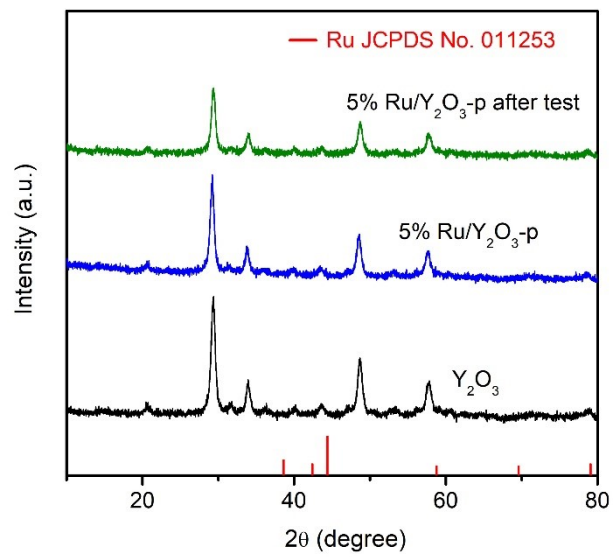

Fig. S3 XRD pattern of 5% Ru/Y<sub>2</sub>O<sub>3</sub>-p sample obtained after stability test.

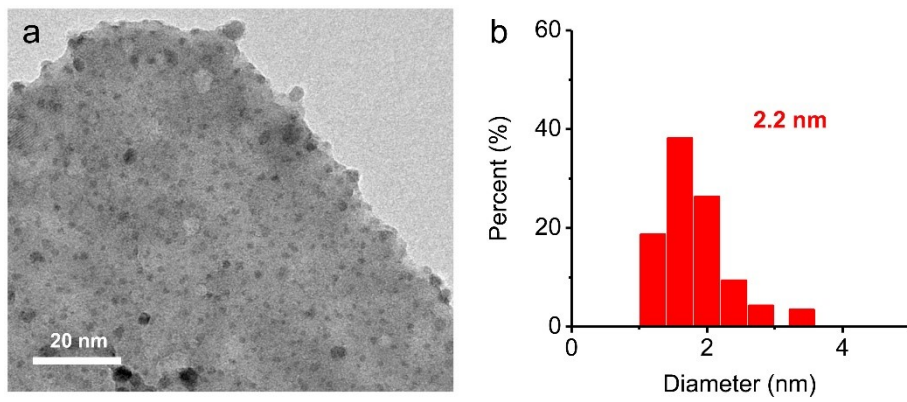

Fig. S4 TEM image and particle size distribution of 5% Ru/Y<sub>2</sub>O<sub>3</sub>-p sample obtained after stability test.

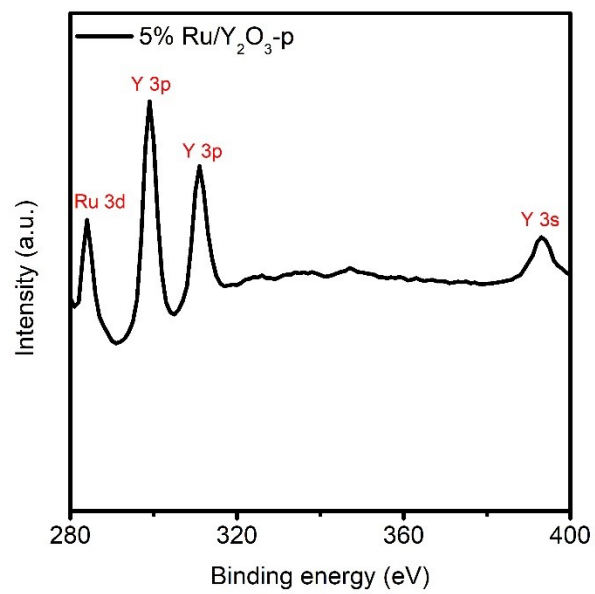

Fig. S5 XPS spectra of 5% Ru/Y<sub>2</sub>O<sub>3</sub>-p catalysts.

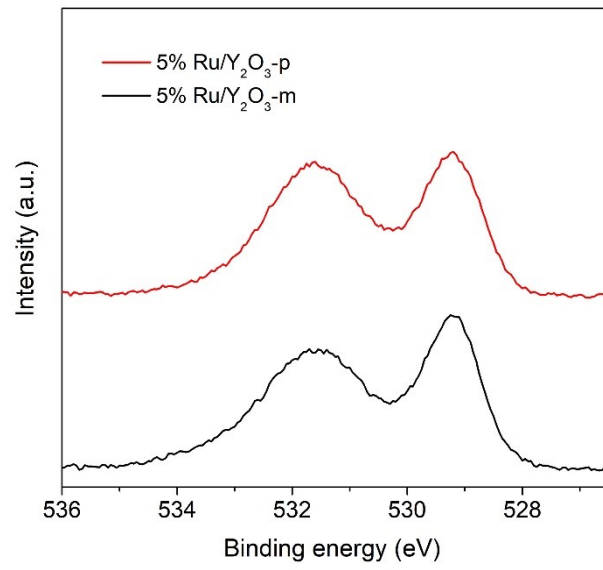

Fig. S6 O 1s core level XPS spectra of 5% Ru/Y<sub>2</sub>O<sub>3</sub>-m and 5% Ru/Y<sub>2</sub>O<sub>3</sub>-p catalysts.



1. M. Hara, M. Kitano and H. Hosono, *ACS Catalysis*, 2017, **7**, 2313-2324.
2. K. Sato, K. Imamura, Y. Kawano, S. Miyahara, T. Yamamoto, S. Matsumura and K. Nagaoka, *Chem. Sci.*, 2017, **8**, 674-679.
3. Y. Ogura, K. Sato, S. I. Miyahara, Y. Kawano, T. Toriyama, T. Yamamoto, S. Matsumura, S. Hosokawa and K. Nagaoka, *Chem Sci*, 2018, **9**, 2230-2237.
4. Y. Ogura, K. Tsujimaru, K. Sato, S.-i. Miyahara, T. Toriyama, T. Yamamoto, S. Matsumura and K. Nagaoka, *ACS Sustainable Chemistry & Engineering*, 2018, **6**, 17258-17266.
5. H. Yamashita, T. Broux, Y. Kobayashi, F. Takeiri, H. Ubukata, T. Zhu, M. A. Hayward, K. Fujii, M. Yashima, K. Shitara, A. Kuwabara, T. Murakami and H. Kageyama, *J Am Chem Soc*, 2018, **140**, 11170-11173.
6. M. Hattori, T. Mori, T. Arai, Y. Inoue, M. Sasase, T. Tada, M. Kitano, T. Yokoyama, M. Hara and H. Hosono, *ACS Catalysis*, 2018, **8**, 10977-10984.
7. M. Kitano, Y. Inoue, H. Ishikawa, K. Yamagata, T. Nakao, T. Tada, S. Matsuishi, T. Yokoyama, M. Hara and H. Hosono, *Chem Sci*, 2016, **7**, 4036-4043.
8. Y. Kadowaki and K. Aika, *Journal of Catalysis*, 1996, **161**, 178-185.
9. A. Miyazaki, I. Balint, K.-i. Aika and Y. Nakano, *Journal of Catalysis*, 2001, **204**, 364-371.
